# Supplementary material for: Effects of Sacrificing Tensor Tympani Muscle Tendon When Manubrium of Malleus Is Foreshortened in Type I Tympanoplasty
Source: Int J Otolaryngol. 2015 Nov 30;2015:531296. doi: 10.1155/2015/531296 (PMC4677199; doi:10.1155/2015/531296)
Supplement: Supplementary file 1 — The xl sheet shows post operative air bone gaps of cases in group A and group B. Student t test was used for statistical analysis and to calculate the p value. [file 531296.f1.xls]

## Sheet: Sheet1
16.67	18.33
15	18.33
10	16.67
11.67	18.33
13.33	18.33
11.67	16.67
13.33	15						t-Test: Two-Sample Assuming Equal Variances
20	20
21.67	26.67							Variable 1	Variable 2
15	25						Mean	14.921	19.8807
20	23.33						Variance	11.1061	6.55996
13.33	21.67						Observations	42	42
11.67	20						Pooled Variance	8.83302
13.33	18.33						Hypothesized Mean Difference	0
15	18.33						df	82
16.67	21.67						t Stat	-7.64744
18.33	20						P(T<=t) one-tail	1.73681e-11
11.67	23.33						t Critical one-tail	1.66365
15	21.67						P(T<=t) two-tail	3.47363e-11
10	23.33						t Critical two-tail	1.98932
8.33	21.67
16.67	20
15	16.67
15	18.33
11.67	18.33
11.67	16.67
11.67	18.33
13.33	21.67
20	20
21.67	20
15	15
16.67	21.67
20	20
18.33	18.33
11.67	21.67
15	23.33
13.33	21.67
13.33	18.33
15	18.33
13.33	20
16.67	18.33
20	21.67
14.921	19.8807
Group A	Group B
